# Supplementary material
Source: ML conference proceedings conference paper supplement (https://openaccess.thecvf.com/content/CVPR2026/html/Xarles_AdaSpot_Spend_Resolution_CVPR_2026_paper.html)
Supplement: Supplementary file 1 [file README.pdf › README.pdf]

In this Supplementary Material, we provide the following files along with their corresponding descriptions:

- **SupplementaryMaterial\_AdaSpot.pdf** - Main supplementary document.
- **Video\_Predictions\_FineDiving.mp4** - Example of AdaSpot's predictions on the FineDiving dataset (Section G.2).
- **Video\_Predictions\_FineGym.mp4** - Example of AdaSpot's predictions on the FineGym dataset (Section G.2).
- **Video\_Predictions\_SNBAS.mp4** - Example of AdaSpot's predictions on the SN-BAS dataset (Section G.2).
- **Video\_Predictions\_Tennis.mp4** - Example of AdaSpot's predictions on the Tennis dataset (Section G.2).
- **Video\_SaliencyRoIs\_F3Set\_1.mp4** - Example 1 of AdaSpot's saliency maps and selected RoIs on the F3Set dataset (Section G.2).
- **Video\_SaliencyRoIs\_F3Set\_2.mp4** - Example 2 of AdaSpot's saliency maps and selected RoIs on the F3Set dataset (Section G.2).
- **Video\_SaliencyRoIs\_FineDiving\_1.mp4** - Example 1 of AdaSpot's saliency maps and selected RoIs on the FineDiving dataset (Section G.2).
- **Video\_SaliencyRoIs\_FineDiving\_2.mp4** - Example 2 of AdaSpot's saliency maps and selected RoIs on the FineDiving dataset (Section G.2).
- **Video\_SaliencyRoIs\_FineGym\_1.mp4** - Example 1 of AdaSpot's saliency maps and selected RoIs on the FineGym dataset (Section G.2).
- **Video\_SaliencyRoIs\_FineGym\_2.mp4** - Example 2 of AdaSpot's saliency maps and selected RoIs on the FineGym dataset (Section G.2).
- **Video\_SaliencyRoIs\_SNBAS\_1.mp4** - Example 1 of AdaSpot's saliency maps and selected RoIs on the SN-BAS dataset (Section G.2).
- **Video\_SaliencyRoIs\_SNBAS\_2.mp4** - Example 2 of AdaSpot's saliency maps and selected RoIs on the SN-BAS dataset (Section G.2).
- **Video\_SaliencyRoIs\_Tennis\_1.mp4** - Example 1 of AdaSpot's saliency maps and selected RoIs on the Tennis dataset (Section G.2).
- **Video\_SaliencyRoIs\_Tennis\_2.mp4** - Example 2 of AdaSpot's saliency maps and selected RoIs on the Tennis dataset (Section G.2).

For all prediction videos, we display the predicted class and probability (only for predictions with probability above 20%), together with the temporal error of the prediction. This information is shown from 2 frames before the prediction time to 2 frames after. These videos are provided at **2.5 fps** for clearer visualization.

For videos showing saliency maps and AdaSpot's selected RoIs, the visualizations are presented at **5 fps**, along with the corresponding saliency and RoI information.
